# Supplementary material for: The Efficacy of Topically Applied Curcumin 1% as Alternative or Complementary to Triamcinolone Acetonate in Treatment of Oral Lichen Planus (Randomize Control Trial)
Source: Preprints.org preprint supplement (doi:10.20944/preprints202409.1822.v1), 2024-09-24
Supplement: Supplementary file 2 [file supplementary]

**Tables**

**Table (1):** Comparison between the studied groups regarding VAS Score, Malhotra score, Activity Escidier score and regarding the effect of the treatment modalities on concentrations of Interlukin 6 at different intervals:


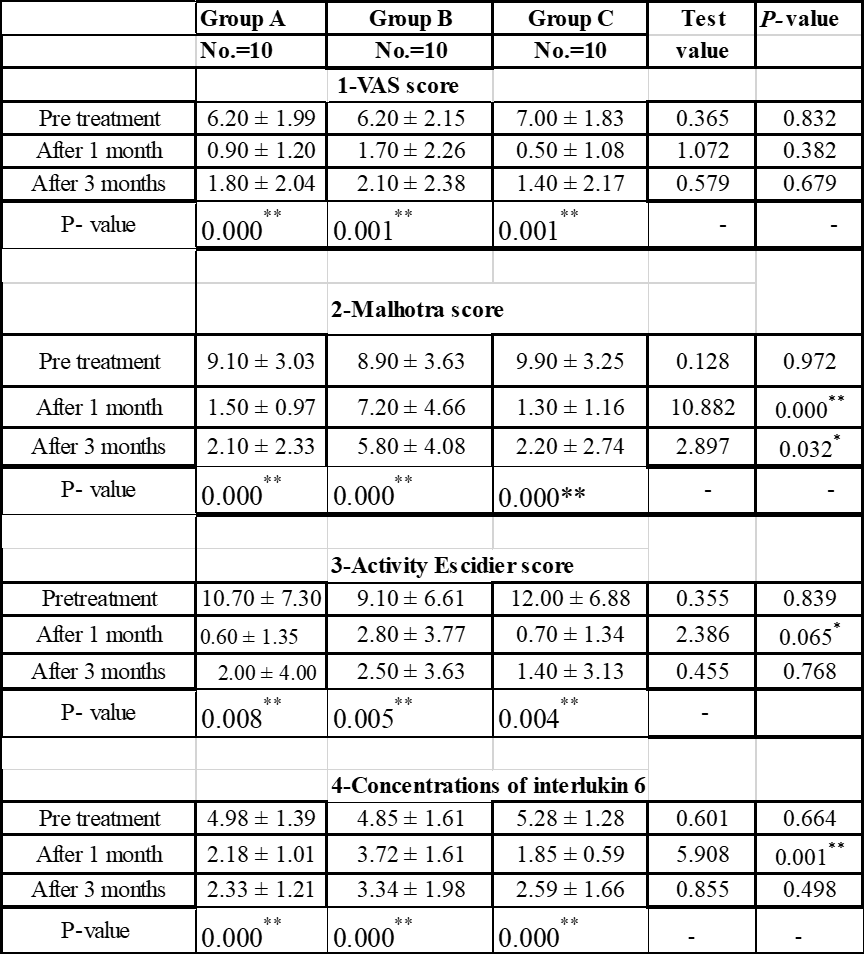


Table (2): Showing post hoc analysis between the studied groups regarding to: VAS score, Malhotra Score, Activity Escidier score and regarding the effect of the treatment modalities on concentrations of Interlukin 6 at different intervals:


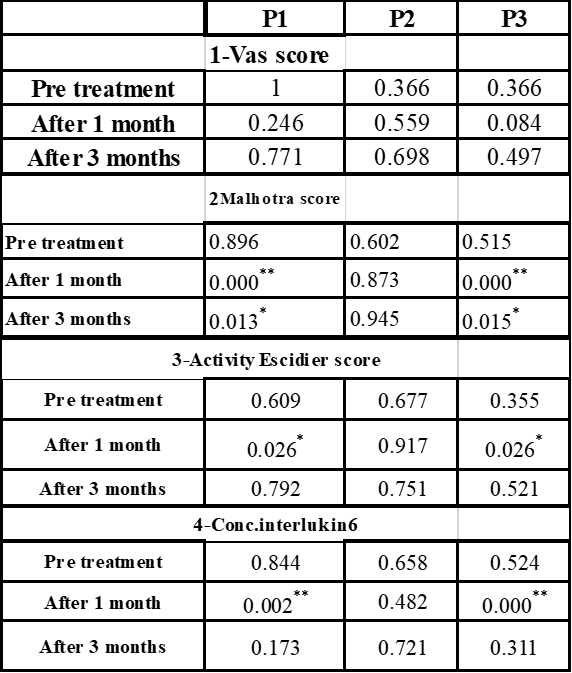


P1: A VS B P2: A VS C P3: B VS C
